# Supplementary material for: Determination of Oxidized Phosphatidylcholines by Hydrophilic Interaction Liquid Chromatography Coupled to Fourier Transform Mass Spectrometry
Source: PubMed Central journal article supplement (PMC4425085; doi:10.3390/ijms16048351), 2015-04-14
Supplement: ijms-16-08351-s001.pdf [file ijms-16-08351-s001.pdf]

# Supplementary Information

Table S1. List of oxidized species derived by Cu<sup>2+</sup> oxidation of PAPC.

| Possible Oxidized Species | Elemental Composition                              | Exact Mass [g/mol] | Possible Structure of Oxidized Moiety |
|---------------------------|----------------------------------------------------|--------------------|---------------------------------------|
| <i>PAPC</i>               | C <sub>44</sub> H <sub>80</sub> NO <sub>8</sub> P  | 781.56211          |                                       |
| <i>PGPC</i>               | C <sub>29</sub> H <sub>56</sub> NO <sub>10</sub> P | 609.36413          |                                       |
| <i>POVPC</i>              | C <sub>29</sub> H <sub>56</sub> NO <sub>9</sub> P  | 593.36922          |                                       |
| <i>PONPC</i>              | C <sub>33</sub> H <sub>64</sub> NO <sub>9</sub> P  | 694.43182          |                                       |
| <i>P-HOdiA-PC</i>         | C <sub>32</sub> H <sub>60</sub> NO <sub>11</sub> P | 665.39034          |                                       |
| <i>P-KOdiA-PC</i>         | C <sub>32</sub> H <sub>58</sub> NO <sub>11</sub> P | 663.37469          |                                       |
| <i>P-HOOA-PC</i>          | C <sub>32</sub> H <sub>60</sub> NO <sub>10</sub> P | 649.39543          |                                       |
| <i>P-KOOA-PC</i>          | C <sub>32</sub> H <sub>58</sub> NO <sub>10</sub> P | 647.37978          |                                       |
| <i>P-HpETE-PC</i>         | C <sub>44</sub> H <sub>80</sub> NO <sub>10</sub> P | 813.55193          |                                       |
| <i>P-HETE-PC</i>          | C <sub>44</sub> H <sub>80</sub> NO <sub>9</sub> P  | 797.55702          |                                       |
| <i>5,6-PEIPC</i>          | C <sub>44</sub> H <sub>78</sub> NO <sub>11</sub> P | 827.53119          |                                       |
| <i>5,6-PECPC</i>          | C <sub>44</sub> H <sub>76</sub> NO <sub>10</sub> P | 809.52063          |                                       |
| <i>P-isoPGA2-PC</i>       | C <sub>44</sub> H <sub>78</sub> NO <sub>10</sub> P | 811.53628          |                                       |
| <i>P-isoPGF2-PC</i>       | C <sub>44</sub> H <sub>82</sub> NO <sub>11</sub> P | 831.56249          |                                       |
| <i>P-isoPGG2-PC</i>       | C <sub>44</sub> H <sub>80</sub> NO <sub>12</sub> P | 845.54175          |                                       |
| <i>P-KODA-PC</i>          | C <sub>36</sub> H <sub>66</sub> NO <sub>11</sub> P | 719.43729          |                                       |
| <i>P-HDdiA-PC</i>         | C <sub>36</sub> H <sub>68</sub> NO <sub>11</sub> P | 721.45294          |                                       |

Table S1. Cont.

| Possible Oxidized Species | Elemental Composition                              | Exact Mass [g/mol] | Possible Structure Of Oxidized Moiety                                              |
|---------------------------|----------------------------------------------------|--------------------|------------------------------------------------------------------------------------|
| <i>P-isoLG-PC</i>         | C <sub>44</sub> H <sub>80</sub> NO <sub>11</sub> P | 829.54684          | 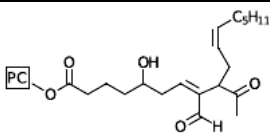 |
| <i>P-isoTxB2-PC</i>       | C <sub>44</sub> H <sub>82</sub> NO <sub>11</sub> P | 847.55740          |  |
| <i>P-furanoyl PC</i>      | C <sub>32</sub> H <sub>58</sub> NO <sub>9</sub> P  | 631.38487          |                                                                                    |
| <i>PNDPC</i>              | C <sub>33</sub> H <sub>64</sub> NO <sub>10</sub> P | 665.42673          |                                                                                    |
|                           | C <sub>31</sub> H <sub>58</sub> NO <sub>9</sub> P  | 619.38487          | no matching literature known structure                                             |
|                           | C <sub>31</sub> H <sub>60</sub> NO <sub>9</sub> P  | 621.40052          | no matching literature known structure                                             |
|                           | C <sub>32</sub> H <sub>62</sub> NO <sub>9</sub> P  | 635.41617          | no matching literature known structure                                             |
|                           | C <sub>33</sub> H <sub>62</sub> NO <sub>9</sub> P  | 647.41617          | no matching literature known structure                                             |
|                           | C <sub>33</sub> H <sub>62</sub> NO <sub>10</sub> P | 663.41108          | no matching literature known structure                                             |
|                           | C <sub>34</sub> H <sub>68</sub> NO <sub>9</sub> P  | 665.46312          | no matching literature known structure                                             |
|                           | C <sub>42</sub> H <sub>80</sub> NO <sub>9</sub> P  | 773.55702          | no matching literature known structure                                             |
|                           | C <sub>42</sub> H <sub>78</sub> NO <sub>10</sub> P | 787.53628          | no matching literature known structure                                             |
|                           | C <sub>42</sub> H <sub>78</sub> NO <sub>11</sub> P | 803.53119          | no matching literature known structure                                             |
|                           | C <sub>42</sub> H <sub>80</sub> NO <sub>10</sub> P | 789.55193          | no matching literature known structure                                             |
|                           | C <sub>44</sub> H <sub>82</sub> NO <sub>9</sub> P  | 799.57267          | no matching literature known structure                                             |
|                           | C <sub>44</sub> H <sub>82</sub> NO <sub>10</sub> P | 815.56758          | no matching literature known structure                                             |
|                           | C <sub>44</sub> H <sub>84</sub> NO <sub>9</sub> P  | 801.58832          | no matching literature known structure                                             |
|                           | C <sub>44</sub> H <sub>84</sub> NO <sub>10</sub> P | 817.58323          | no matching literature known structure                                             |
|                           | C <sub>46</sub> H <sub>84</sub> NO <sub>11</sub> P | 841.58323          | no matching literature known structure                                             |

Table S2. List of standard compounds used for development of HILIC chromatography.

| IUPAC Names of Lipid-Standard Substances                                               | Synonym      |
|----------------------------------------------------------------------------------------|--------------|
| 1,2-dipalmitoyl- <i>sn</i> -glycero-3-phosphocholine                                   | PC 16:0/16:0 |
| 1,2-dibehenoyl- <i>sn</i> -glycero-3-phosphocholine                                    | PC 22:0/22:0 |
| 1,2-dimyristoyl- <i>sn</i> -glycero-3-phosphocholine                                   | PC 14:0/14:0 |
| 1,2-dilauroyl- <i>sn</i> -glycero-3-phosphocholine                                     | PC 12:0/12:0 |
| 1,2-distearoyl- <i>sn</i> -glycero-3-phosphocholine                                    | PC 18:0/18:0 |
| 1,2-dieicosanoyl- <i>sn</i> -glycero-3-phosphocholine                                  | PC 20:0/20:0 |
| 1-hexadecanoyl-2-(5Z,8Z,11Z,14Z-eicosatetraenoyl)- <i>sn</i> -glycero-3-phosphocholine | PC 16:0/20:4 |
| 1-palmitoyl-2-oleoyl- <i>sn</i> -glycero-3-phospho-L-serine (sodium salt)              | PS 16:0/18:1 |
| 1,2-dilauroyl- <i>sn</i> -glycero-3-phospho-L-serine (sodium salt)                     | PS 12:0/12:0 |
| 1-stearoyl-2-arachidonoyl- <i>sn</i> -glycero-3-phosphoethanolamine                    | PE 18:0/20:4 |
| 1,2-dilauroyl- <i>sn</i> -glycero-3-phosphoethanolamine                                | PE 12:0/12:0 |
| 1-hexadecanoyl-2-(9Z-octadecanoyl)- <i>sn</i> -glycero-3-phosphoethanolamine           | PE 16:0/18:1 |
| 1-octadecyl- <i>sn</i> -glycero-3-phosphocholine                                       | LPC 18:0     |
| sphingomyelins (bovine brain)                                                          |              |

Table S2. *Cont.*

| IUPAC Names of Lipid-Standard Substances                                | Synonym           |
|-------------------------------------------------------------------------|-------------------|
| 1,2,3-tripalmitoyl-glycerol                                             | TG 16:0/16:0/16:0 |
| 1,2,3-tristearoyl-glycerol                                              | TG 18:0/18:0/18:0 |
| 1,2,3-heptadecanoyl-glycerol                                            | TG 17:0/17:0/17:0 |
| 1,3-dioctadecanoyl-2-(9Z-octadecanoyl)- <i>sn</i> -glycerol             | TG 18:0/18:1/18:0 |
| 1,3-dioctadecanoyl-2-(9Z,12Z-octadecadienoyl)- <i>sn</i> -glycerol      | TG 18:0/18:2/18:0 |
| 1,3-dioctadecanoyl-2-(9Z,12Z,15Z-octadecatrienoyl)- <i>sn</i> -glycerol | TG 18:0/18:3/18:0 |
| 1,2-dilauroyl- <i>sn</i> -glycerol                                      | DG 12:0/12:0      |
| 1,2-dipalmitoyl- <i>sn</i> -glycerol                                    | DG 16:0/16:0      |
| 1,2-distearoyl- <i>sn</i> -glycerol                                     | DG 18:0/18:0      |

### List of Abbreviations used in Table 3

**HETE:** hydroxyicosatetraenoic acid- *sn*-glycero-3-phosphocholine

**HODA:** 9-hydroxy-12-oxo-10-dodecenoic acid

**HODE:** Hydroxyoctadecadienoic acid

**HOdiA:** 5-hydroxy-6-octenedioic acid

**HOOA:** 5-hydroxy-8-oxo-6-octenoic acid

**HpETE:** hydroperoxyicosatetraenoic acid

**HpODE:** hydroperoxyoctadecadienoic acid

**isoLGD<sub>2</sub>:** isolevuglandine D<sub>2</sub>

**isoLGE<sub>2</sub>:** isolevuglandine E<sub>2</sub>

**isoPGA<sub>2</sub>:** isoprostaglandine A<sub>2</sub>

**isoPGD<sub>2</sub>:** isoprostaglandine D<sub>2</sub>

**isoPGE<sub>2</sub>:** isoprostaglandine E<sub>2</sub>

**isoPGF<sub>2α</sub>:** isoprostaglandine F<sub>2α</sub>

**isoPGG<sub>2</sub>:** isoprostaglandine G<sub>2</sub>

**isoPGH<sub>2</sub>:** isoprostaglandine H<sub>2</sub>

**isoPGJ<sub>2</sub>:** isoprostaglandine J<sub>2</sub>

**isoTxA<sub>2</sub>:** isothromboxane A<sub>2</sub>

**isoTxB<sub>2</sub>:** isothromboxane B<sub>2</sub>

**KHdiA:** 3-keto-4-hexendioic acid

**KOdiA:** 5-keto-6-octendioic acid

**EC:** 5,6-epoxyprostane A<sub>2</sub>

**EI:** 5,6-epoxyprostane E<sub>2</sub>

**G:** glutaric acid

**ON:** 9'-oxo-nonanoic acid

**OV:** 5'-oxo-valeric acid
